# Supplementary material for: DNA preservation in silk
Source: Royal Society of Chemistry journal article supplement (doi:10.1039/c6bm00741d), 2017-01-01
Supplement: c6bm00741d1.pdf [file c6bm00741d1.pdf]

## **Appendix**

### **FTIR measurement on silk films with an without methanol treatment**

The secondary structures of silk films were determined using FTIR spectrometry (Nicolet 5700, USA) for measurement in the reflection mode. The measurement range was 1200-1800  $\text{cm}^{-1}$ . The incident beam wavelength was 0.154 nm. The secondary structures present in the films, including random coils, alpha-helices, beta-sheets and beta-turns, were evaluated using software (peakfit 4.12) through Fourier self-deconvolution (FSD) of the infrared absorbance spectra, with a focus on the amide I region (1595 - 1705  $\text{cm}^{-1}$ ).

A 100  $\mu\text{L}$  aliquot of silk solution at 3% and 6% was pipetted into a 24-well plate. The samples were dried in the fume hood overnight. After drying, 1 ml methanol was added into half of the wells and the samples were incubated for 2 hrs before being dried in the fume hood. Both the methanol-treated and untreated film were subjected to FTIR measurement as described in the Materials and Methods. The same amount of silk solution (3%, 100  $\mu\text{L}$  each well) were also lyophilized and subjected to FTIR.

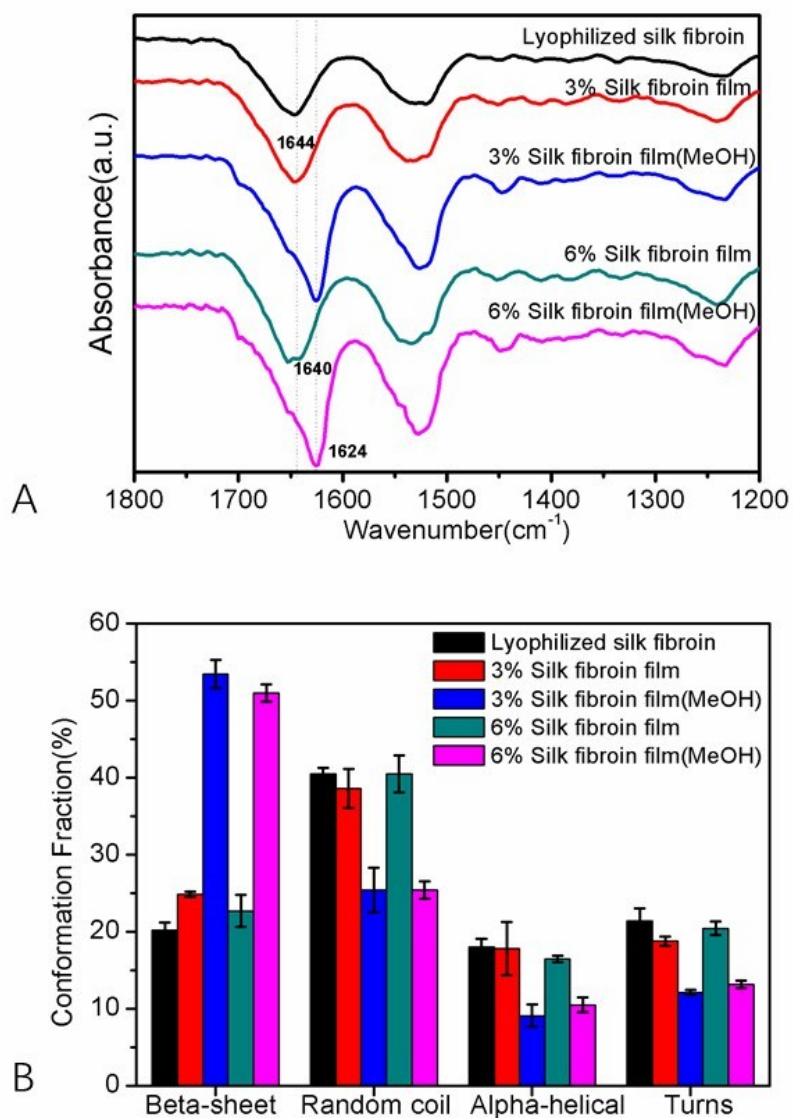

**FIGURE S1. FTIR measurement on methanol-treated and untreated silk films.**

Lyophilized silk served as control. A, FTIR spectra showing the absorbance peaks at Amide I and II regions. B, secondary contents calculated based on the Amide I peaks after Fourier deconvolution.

### DNA extraction from the pre-treated filter paper with DNA deposited directly

A 100  $\mu\text{L}$  aliquot of silk solution at 1, 3, 6% was pipetted on the filter paper placed in the 24-well plates. The samples were dried in the fume hood overnight. After drying, 1 mL methanol was added into each well and the samples were incubated for 2 hrs before being dried in the fume hood. The DNA solution (96 ng/ $\mu\text{L}$ , 40  $\mu\text{L}$ ) was pipetted on the dried filter paper. The 24-well plates were placed in the fume hood overnight until the solution dried completely. The samples prepared using post-treatment deposition method are referred to as DNA+silk-PT-filter.

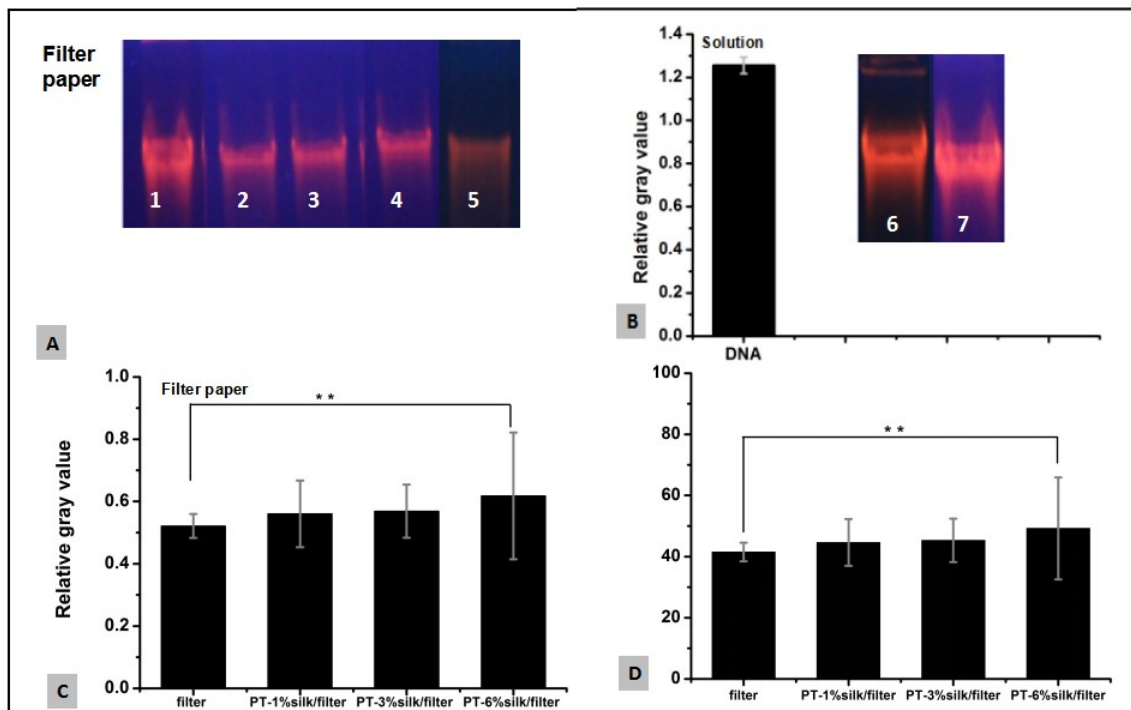

**FIGURE S2. DNA extraction from the pre-treated filter paper with DNA deposited directly.** A: Gel electrophoresis on DNA samples. Lanes 1, 6: control DNA (96 ng/ $\mu\text{L}$ ) stored at  $-80^{\circ}\text{C}$ ; lanes 2: DNA+filter; lanes 3: DNA+1% silk-PT-filter; lanes 4: DNA+3% silk-PT-filter; Lanes 5: DNA+6% silk-PT-filter; Lanes 2, 3, 4, 5: DNA

extracted from the filter papers; Lanes 7: DNA solution loaded directly to the gel. B: Relative gray values of the DNA solution samples. C: Relative gray value of DNA extracted from the filter papers (upper panel in A). D: Extraction recovery of DNA from the filter papers. N = 4. \*\*indicates significant difference ( $p < 0.005$ ) between groups.
